# Supplementary material for: Bold personality makes domestic dogs entering a shelter less vulnerable to diseases
Source: PubMed Central journal article supplement (PMC5875777; doi:10.1371/journal.pone.0193794), 2018-03-29
Supplement: pone.0193794.s001.pdf [file pone.0193794.s001.pdf]

S1. Table with raw data regarding behavioural patterns in cages, physiological parameters

| <b>NAMES</b>     | <b>MICROCHIP</b> | <b>BREED</b> | <b>ALONE/NOT ALONE</b> | <b>SEX</b> | <b>AGE</b> |
|------------------|------------------|--------------|------------------------|------------|------------|
| Pis              | 380260041021944  | M            | NA                     | M          | 3          |
| Schizzo          | 380260040995215  | M            | NA                     | M          | 2          |
| Nervo            | 380260041021359  | M            | A                      | M          | 2          |
| Sofficino Gandhi | 380260040911346  | M            | NA                     | M          | 6          |
| Sally            | 380260041021159  | P            | NA                     | F          | 2          |
| Ululì            | 380260000947785  | M            | A                      | M          | 2,3        |
| Chica            | 380260000947946  | M            | NA                     | F          | 1,3        |
| Bugs Bunny       | 380260040963413  | M            | NA                     | M          | 1,3        |
| Mary             | 380260000936843  | M            | NA                     | F          | 1          |
| Ab               | 380260040926747  | M            | NA                     | F          | 4          |
| Frollo           | 380260040931428  | P            | NA                     | M          | 1          |
| Bistecca         | 380260040929898  | P            | A                      | M          | 1          |
| Max              | 380260000941876  | P            | A                      | M          | 3          |
| Ugo              | 380260000936564  | P            | A                      | M          | 5          |
| Pedalino         | 380260000933489  | M            | NA                     | M          | 1,6        |
| Vecchio Rex      | 380260000940858  | P            | A                      | M          | 7          |
| Ercole           | 380260000945357  | P            | A                      | M          | 6          |
| Pedro            | 380 260000929461 | P            | A                      | M          | 6          |
| Benjo            | 380260002134065  | P            | NA                     | M          | 3          |
| Pippo            | 380260002133164  | M            | NA                     | M          | 3          |
| Margot           | 380260002133541  | M            | NA                     | F          | 3          |
| Rott             | 380260002133641  | P            | NA                     | F          | 2          |
| Ribes            | 380260002166348  | M            | NA                     | M          | 2          |
| Bho              | 380260002171583  | P            | NA                     | M          | 2          |
| Bravery          | 380260002177736  | P            | NA                     | F          | 2          |
| Pinza            | 380260002185476  | M            | NA                     | M          | 2          |
| Ettore           | 380260002167372  | M            | A                      | M          | 5          |
| Peggy            | 380260000937386  | P            | NA                     | F          | 3          |

| ers and reaction pf dogs during the the Novel Object test |                                          |                       |                    |
|-----------------------------------------------------------|------------------------------------------|-----------------------|--------------------|
| <b>CONDITIONS AT ENTRY</b>                                | <b>Symptoms</b>                          | <b>1 - Leukocytes</b> | <b>Neutrophils</b> |
| Poor conditions. parasitic otitis and ectoparasites       | None                                     | 7,87                  | 5,89               |
| Good                                                      | Vomiting and diarrhoea                   | 19,10                 | 15,8               |
| Good                                                      | None                                     | 17,00                 | 13,6               |
| Good                                                      | None                                     | 6,57                  | 4,24               |
| Good                                                      | None                                     | 13,20                 | 8,6                |
| Dislocated hip-joint                                      | Diarrhoea                                | 11,80                 | 9,94               |
| Good                                                      | Diarrhoea                                | 11,10                 | 8,42               |
| Good                                                      | None                                     | 17,30                 | 15,2               |
| Good                                                      | Diarrhoea                                | 25,60                 | 20,6               |
| Good                                                      | None                                     | 13,80                 | 9,22               |
| Good                                                      | Diarrhoea                                | 16,00                 | 13,9               |
| Good                                                      | None                                     | 11,60                 | 8,68               |
| Good                                                      | None                                     | 27,00                 | 21,7               |
| Good                                                      | Vomiting, diarrhoea and loss of appetite | 12,40                 | 9,88               |
| Good                                                      | Diarrhoea                                | 12,40                 | 8,15               |
| Good                                                      | Bilateral otitis                         | 13,70                 | 10,2               |
| Good                                                      | None                                     | 15,30                 | 13,1               |
| Good                                                      | Diarrhoea                                | 12,50                 | 9,18               |
| Good                                                      | None                                     | 17,1                  | 10,4               |
| Good                                                      | Inflammation of the penis                | 14,9                  | 10,9               |
| Good                                                      | None                                     | 12,9                  | 7,5                |
| Good                                                      | None                                     | 6.40                  | 4.84               |
| Good                                                      | None                                     | 28,3                  | 23,2               |
| Good                                                      | None                                     | 10,8                  | 7,8                |
| Good                                                      | None                                     | 13,3                  | 7,78               |
| Good                                                      | Cough reverse and bloody diarrhoea       | 10,5                  | 4,85               |
| Good                                                      | None                                     | 10,3                  | 7,77               |
| Good                                                      | None                                     | 11,7                  | 6,32               |

| lymphocytes | Monocytes | Eosinophils | Red cells | Haemoglobin | Haematocrit | Lysozyme (µg/ml) | Serum protein | Albumin/Globulin | Haptoglobin | CD4/CD8 |
|-------------|-----------|-------------|-----------|-------------|-------------|------------------|---------------|------------------|-------------|---------|
| 0,837       | 0,603     | 0,46        | 7,02      | 15,6        | 47,3        | 3,53             | 6,80          | 1,00             | 1,37        | 2,05    |
| 1,31        | 1,12      | 0,584       | 6,74      | 16,7        | 51          | 6,00             | 7,10          | 0,73             | 1,31        | 2,56    |
| 1,2         | 1,95      | 0           | 7,43      | 16,1        | 51,9        | 7,28             | 6,40          | 0,85             | 1,32        | 2,06    |
| 1,19        | 0,913     | 0,181       | 6,81      | 14,4        | 44,8        | 5,58             | 7,70          | 0,62             | 4,38        | 1,60    |
| 1,76        | 1,65      | 1,08        | 5,85      | 14,1        | 43,4        | 4,99             | 7,20          | 0,59             | 1,52        | 2,01    |
| 0,843       | 0,815     | 0,139       | 7,19      | 17          | 50,1        | 7,86             | 6,80          | 0,71             | 2,41        | 0,79    |
| 0,978       | 1,14      | 0,414       | 7,19      | 16,7        | 50,5        | 7,17             | 7,10          | 1,05             | 1,32        | 1,48    |
| 0,629       | 1,17      | 0           | 7,07      | 16,8        | 50,9        | 7,93             | 7,00          | 0,75             | 2,15        | 1,90    |
| 1,54        | 3,18      | 0,013       | 6,38      | 15,7        | 47,9        | 7,67             | 6,50          | 0,82             | 1,31        | 2,98    |
| 1,87        | 0,747     | 1,86        | 6,87      | 16,6        | 48,4        | 2,23             | 6,10          | 0,93             | 1,61        | 4,13    |
| 1,02        | 0,975     | 0,034       | 7,37      | 17,9        | 52,8        | 3,11             | 6,40          | 1,04             | 1,54        | 2,85    |
| 1,7         | 0,729     | 0,459       | 7,14      | 17,7        | 52,6        | 4,55             | 6,40          | 0,88             | 1,10        | 3,59    |
| 1,52        | 3,15      | 0,634       | 7,66      | 18,8        | 53,6        | 7,68             | 6,90          | 0,81             | 2,23        | 2,10    |
| 1,46        | 0,903     | 0,013       | 8,52      | 20,3        | 57          | 3,58             | 7,50          | 0,55             | 2,92        | 3,10    |
| 2,58        | 0,888     | 0,687       | 7,8       | 18,7        | 54,4        | 2,12             | 6,50          | 0,99             | 1,56        | 4,76    |
| 1,27        | 1,32      | 0,849       | 7,97      | 19,3        | 56,3        | 6,66             | 8,20          | 0,59             | 2,60        | 1,85    |
| 1,2         | 0,943     | 0,039       | 8,61      | 20,4        | 58,3        | 2,82             | 6,40          | 1,05             | 1,26        | 2,98    |
| 1,54        | 0,762     | 0,906       | 6,69      | 15,9        | 46,3        | 3,26             | 7,00          | 0,79             | 0,39        | 1,50    |
| 2,97        | 1,53      | 2,01        | 6,67      | 15,2        | 46,3        | 3,13             | 7,30          | 0,73             | 1,88        | 2,89    |
| 1,32        | 1,15      | 1,4         | 7,5       | 18,4        | 52,2        | 2,77             | 6,90          | 0,79             | 0,00        | 3,12    |
| 3,25        | 1,04      | 1,05        | 6,94      | 17,8        | 51,5        | 2,44             | 6,6           | 0,74             | 1,96        | 1,74    |
| 0.553       | 0.023     | 0.984       | 7.25      | 17.2        | 53.0        | 2.85             | 7,8           | 0,8              | 9.5         | 4.66    |
| 1,42        | 2,51      | 0,439       | 6,44      | 16,1        | 46.6        | 1,7              | 6,9           | 0,94             | 2,58        | 2,21    |
| 1,08        | 1,07      | 0,769       | 7,52      | 18,2        | 52,7        | 2,01             | 6,8           | 0,72             | 10,46       | 2,57    |
| 1,92        | 1,33      | 2,18        | 7,02      | 16,6        | 49,2        | 2,17             | 6,5           | 0,77             | 7,13        | 3,8     |
| 2,24        | 1,32      | 1,97        | 8,34      | 21,5        | 60,8        | 1,54             | 6,6           | 1,03             | 1,91        | 1,69    |
| 0,596       | 1,68      | 0,06        | 7,07      | 17,4        | 51,3        | 2,35             | 7             | 0,93             | 4,14        | 5,9     |
| 3           | 0,618     | 1,76        | 7,42      | 19,2        | 55,6        | 13,5             | 6,7           | 0,78             | 1,56        | 2,4     |

| Total antioxidants | dRoms | Ehrlichia | Leishmania | 2 - Leukocytes | Neutrophils | lymphocytes | Monocytes | Eosinophils | Red cells |
|--------------------|-------|-----------|------------|----------------|-------------|-------------|-----------|-------------|-----------|
|                    | 23    | N         | N          | 12,50          | 8,35        | 1,67        | 1,29      | 1,14        | 7,08      |
|                    |       | N         | N          | 22,90          | 12,9        | 5,84        | 1,87      | 2,12        | 7,99      |
|                    | 34    | N         | N          | 13,90          | 9,41        | 1,46        | 2,05      | 0,696       | 7,35      |
|                    | 32    | N         | N          | 6,69           | 4,43        | 1,14        | 0,567     | 0,438       | 7,19      |
|                    |       | N         | N          | 14,50          | 10,4        | 2,14        | 1,14      | 0,722       | 6,59      |
| 377                | 51    | N         | N          | 9,09           | 7,15        | 0,772       | 0,73      | 0,323       | 7,22      |
| 295                |       | N         | N          | 13,80          | 10,8        | 1,57        | 0,944     | 0,442       | 7,24      |
| 318                | 64    | N         | N          | 8,68           | 6,58        | 0,772       | 1,19      | 0,001       | 7,29      |
| 409                | 41    | N         | N          | 13,20          | 9,12        | 2,2         | 1,67      | 0,005       | 7,55      |
| 599                |       | N         | N          | 8,59           | 4,76        | 1,6         | 1,05      | 1,08        | 6,93      |
| 665                | 12    | N         | N          | 23,30          | 18,9        | 1,34        | 2,65      | 0,256       | 6,92      |
| 417                | 14    | N         | N          | 7,76           | 4,51        | 2,02        | 0,591     | 0,584       | 7,87      |
| 476                | 74    | N         | N          | 11,00          | 5,33        | 2,58        | 1,46      | 1,52        | 7,64      |
| 699                | 67    | N         | N          | 14,40          | 11          | 1,9         | 1,4       | 0,002       | 7,99      |
| 363                | 16    | N         | N          | 16,20          | 12,4        | 1,87        | 1,23      | 0,733       | 7,86      |
| 504                | 26    | N         | N          | 15,60          | 8,49        | 1,83        | 1,42      | 3,61        | 6,47      |
| 296                |       | N         | N          | 13,50          | 9,07        | 1,74        | 1,54      | 1           | 8,01      |
| 358                | 49    | N         | N          | 12,80          | 7,75        | 1,86        | 1,29      | 1,8         | 7,21      |
| 642                | 33    | N         | N          | 14,5           | 8,4         | 2,65        | 0,647     | 2,75        | 7,69      |
| 689                | 45    | N         | N          | 21,1           | 18          | 1,37        | 1,29      | 0,155       | 7,98      |
| 405                | 42    | N         | N          | 10,2           | 5,91        | 2,67        | 0,662     | 0,907       | 8,22      |
| 491                | 39    | N         | N          | 9,73           | 6,90        | 1,05        | 1,17      | 0,581       | 7,50      |
| 302                | 40    | N         | N          | 14,6           | 10,6        | 1,32        | 1,58      | 0,802       | 7,16      |
| 312                | 71    | N         | N          | 13,7           | 7,9         | 2,2         | 0,855     | 2,51        | 7,29      |
| 306                |       | N         | N          | 11,9           | 6,94        | 2,51        | 0,816     | 1,51        | 7,37      |
| 342                | 16    | N         | N          | 11,2           | 6,42        | 2,21        | 0,805     | 1,66        | 7,73      |
| 350                | 48    | N         | N          | 9,28           | 6,42        | 1,24        | 0,737     | 0,788       | 7,76      |
| 116                | 9     | N         | N          | 6,03           | 3,65        | 0,502       | 0,284     | 1,6         | 7,3       |

| Haemoglobin | Haematocrit | Lysozyme (µg/ml) | Serum protein | Albumin/Globulin | Haptoglobin | CD4/CD8 | Total antioxidants |
|-------------|-------------|------------------|---------------|------------------|-------------|---------|--------------------|
| 16          | 47,7        | 3,48             | 7,00          | 0,79             | 0,64        | 2,70    |                    |
| 16,7        | 50,1        | 3,07             | 6,30          | 0,72             | 3,95        | 2,00    |                    |
| 16          | 49,4        | 4,88             | 6,10          | 0,89             | 1,55        | 2,64    |                    |
| 14,8        | 47,4        | 5,58             | 7,40          | 0,75             | 2,14        | 0,77    | 350                |
| 15,4        | 48,6        | 7,17             | 6,00          | 0,87             | 0,31        | 3,20    | 260                |
| 17,2        | 51,1        | 6,72             | 6,90          | 0,79             | 4,76        | 0,69    | 321                |
| 16,4        | 50,2        | 8,12             | 6,50          | 0,76             | 4,71        | 1,53    | 309                |
| 17,1        | 51,7        | 3,59             | 6,50          | 0,72             | 4,88        | 0,60    | 302                |
| 19          | 54,2        |                  |               |                  |             | 2,16    |                    |
| 16,6        | 48,8        | 6,35             | 7,10          | 0,71             | 1,16        | 2,10    | 454                |
| 16,7        | 47,4        | 5,50             | 6,50          | 0,84             | 2,85        | 3,20    | 280                |
| 19,6        | 56,2        | 3,42             | 6,80          | 0,81             | 1,47        | 2,90    | 495                |
| 18,5        | 53,8        | 3,94             | 6,70          | 0,75             | 1,94        | 2,80    | 424                |
| 18,9        | 53,7        | 4,13             | 7,10          | 0,58             | 2,31        | 2,19    | 142                |
| 18,9        | 55,1        | 4,13             | 6,20          | 0,96             | 0,30        | 4,67    | 389                |
| 16          | 46,1        | 3,58             | 6,80          | 0,59             | 2,60        | 1,34    | 89                 |
| 18,7        | 54          | 3,42             | 6,00          | 0,87             | 0,34        | 3,44    | 55                 |
| 17,2        | 49,9        | 6,35             | 7,40          | 0,68             | 1,25        | 1,22    | 124                |
| 17,9        | 52          | 2,85             | 6,90          | 0,80             | 2,26        | 1,9     | 536                |
| 19,5        | 56,8        | 3,44             | 6,80          | 0,82             | 2,68        | 2,3     | 401                |
| 20,2        | 59,7        | 1,86             | 7,3           | 0,96             | 1,82        | 2,2     | 242                |
| 17,4        | 51,7        | 1,05             | 6,4           | 0,81             | 2,23        | 3,68    | 201                |
| 17,7        | 51,6        | 1,94             | 6,2           | 0,69             | 5,05        | 4,84    | 318                |
| 17,2        | 50,1        | 2,26             | 6,7           | 0,73             | 2,2         | 3,2     | 332                |
| 17,3        | 50,5        | 2,13             | 6,4           | 1,14             | 1,61        | 2,76    | 279                |
| 19,6        | 56,8        | 1,83             | 6,3           | 0,83             | 9,23        | 2,5     | 369                |
| 19          | 56          | 3,36             | 6,7           | 0,91             | 1,21        | 3,25    | 323                |
| 18,6        | 54,8        | 2,38             | 6,3           | 0,83             | 0,16        | 2,67    | 476                |

| dRoms | Ehrlichia | Leishmania | Minutes | 1. Activity | 2. Aggressivity generic | 3. Aggressivity tw hum | 4. Aggressivity tw dogs | 5. Anxiety |
|-------|-----------|------------|---------|-------------|-------------------------|------------------------|-------------------------|------------|
| 37    | N         | N          | 294     | 2,79        | 0,0000                  | 0,0510                 | 0,0034                  | 0,9014     |
| 16    | N         | N          | 300     | 1,89        | 0,0000                  | 0,0900                 | 0,0100                  | 0,5100     |
| 21    | N         | N          | 300     | 4,55        | 0,1833                  | 0,0733                 | 0,1067                  | 0,9333     |
| 59    | N         | N          | 283     | 0,49        | 0,0000                  | 0,0106                 | 0,0000                  | 0,3958     |
| 5     | N         | N          | 300     | 1,53        | 0,0000                  | 0,0367                 | 0,2533                  | 0,4700     |
| 41    | N         | N          | 300     | 1,42        | 0,0433                  | 0,0033                 | 0,0533                  | 0,4133     |
| 33    | N         | N          | 257     | 3,88        | 0,0272                  | 0,0039                 | 0,0039                  | 0,7899     |
|       | N         | N          | 287     | 0,21        | 0,0000                  | 0,0000                 | 0,0000                  | 0,6551     |
|       | N         | N          | 300     | 1,50        | 0,0067                  | 0,0100                 | 0,0033                  | 0,4400     |
|       | N         | N          | 300     | 2,58        | 0,0167                  | 0,0133                 | 0,0233                  | 0,8233     |
| 55    | N         | N          | 292     | 2,45        | 0,0137                  | 0,0000                 | 0,0034                  | 0,6164     |
|       | N         | N          | 300     | 0,90        | 0,0000                  | 0,0100                 | 0,0100                  | 0,7567     |
|       | N         | N          | 300     | 0,75        | 0,0000                  | 0,0433                 | 0,0000                  | 0,8133     |
|       | N         | N          | 300     | 0,58        | 0,0000                  | 0,0467                 | 0,0000                  | 0,4500     |
| 31    | N         | N          | 300     | 0,77        | 0,0000                  | 0,0200                 | 0,0167                  | 0,3100     |
| 63    | N         | N          | 300     | 1,31        | 0,0000                  | 0,0133                 | 0,0000                  | 0,4267     |
| 34    | N         | N          | 300     | 5,93        | 0,0000                  | 0,0200                 | 0,0167                  | 0,5667     |
| 51    | N         | N          | 300     | 11,61       | 0,0000                  | 0,0300                 | 0,0067                  | 0,4633     |
| 26    | N         | N          | 300     | 0,39        | 0,0100                  | 0,0067                 | 0,0267                  | 0,5367     |
| 49    | N         | N          | 300     | 1,34        | 0,0100                  | 0,0000                 | 0,0567                  | 1,0500     |
| 7     | N         | N          | 300     | 1,19        | 0,0133                  | 0,0000                 | 0,0233                  | 0,5300     |
| 6     | N         | N          | 300     | 5,03        | 0,0200                  | 0,0000                 | 0,0167                  | 0,9967     |
| 55    | N         | N          | 300     | 1,91        | 0,0200                  | 0,0033                 | 0,0133                  | 0,2933     |
| 30    | N         | N          | 300     | 1,03        | 0,0033                  | 0,0100                 | 0,0233                  | 0,2933     |
| 10    | N         | N          | 300     | 1,16        | 0,0167                  | 0,0000                 | 0,0100                  | 0,1433     |
| 53    | N         | N          | 300     | 4,25        | 0,0367                  | 0,0000                 | 0,0400                  | 1,2167     |
| 83    | N         | N          | 300     | 4,42        | 0,0400                  | 0,0033                 | 0,0100                  | 0,7433     |
|       | N         | N          | 300     | 1,24        | 0,1067                  | 0,0567                 | 0,0400                  | 0,2567     |

| <b>5.bis Stereot norm</b> | <b>5.tris Att. Spost.</b> | <b>6. Attentiveness</b> | <b>7. Dom twd Hum</b> | <b>8. Dom twd dogs</b> | <b>9. Dom generic</b> |
|---------------------------|---------------------------|-------------------------|-----------------------|------------------------|-----------------------|
| 0,0102                    | 0,8912                    | 6,88                    | 0,000                 | 0,014                  | 0,0850                |
| 0,0267                    | 0,4833                    | 2,75                    | 0,000                 | 0,053                  | 0,0067                |
| 0,0300                    | 0,9033                    | 3,95                    | 0,290                 | 0,237                  | 0,2400                |
| 0,0035                    | 0,3922                    | 1,78                    | 0,032                 | 0,007                  | 0,0283                |
| 0,0000                    | 0,4700                    | 5,43                    | 0,110                 | 0,393                  | 0,0767                |
| 0,0033                    | 0,4067                    | 2,72                    | 0,060                 | 0,203                  | 0,1867                |
| 0,0428                    | 0,7043                    | 6,78                    | 0,342                 | 0,311                  | 0,2685                |
| 0,0035                    | 0,6516                    | 1,43                    | 0,010                 | 0,000                  | 0,0035                |
| 0,0267                    | 0,3967                    | 5,01                    | 0,090                 | 0,180                  | 0,0767                |
| 0,0467                    | 0,6400                    | 5,90                    | 0,003                 | 0,007                  | 0,0067                |
| 0,0137                    | 0,6027                    | 6,23                    | 0,000                 | 0,301                  | 0,0171                |
| 0,0100                    | 0,7267                    | 3,00                    | 0,000                 | 0,120                  | 0,0067                |
| 0,1067                    | 0,6367                    | 5,47                    | 0,020                 | 0,023                  | 0,0400                |
| 0,0100                    | 0,4233                    | 1,84                    | 0,007                 | 0,017                  | 0,0067                |
| 0,0100                    | 0,3000                    | 3,46                    | 0,043                 | 0,050                  | 0,0500                |
| 0,0000                    | 0,4267                    | 4,59                    | 0,000                 | 0,000                  | 0,0033                |
| 0,0033                    | 0,5567                    | 6,58                    | 0,013                 | 0,200                  | 0,0567                |
| 0,0033                    | 0,4600                    | 6,55                    | 0,000                 | 0,003                  | 0,1333                |
| 0,0133                    | 0,5233                    | 1,69                    | 0,017                 | 0,037                  | 0,0333                |
| 0,0067                    | 1,0433                    | 3,37                    | 0,013                 | 0,130                  | 0,0767                |
| 0,0867                    | 0,4300                    | 2,68                    | 0,027                 | 0,100                  | 0,1200                |
| 0,0000                    | 0,9900                    | 7,52                    | 0,030                 | 0,457                  | 0,9100                |
| 0,0200                    | 0,2233                    | 6,77                    | 0,160                 | 0,097                  | 0,6100                |
| 0,0333                    | 0,2600                    | 4,66                    | 0,023                 | 0,150                  | 0,1233                |
| 0,0000                    | 0,1400                    | 4,83                    | 0,030                 | 0,057                  | 0,1467                |
| 0,3200                    | 0,8967                    | 5,65                    | 0,000                 | 0,057                  | 0,1367                |
| 0,0567                    | 0,6733                    | 4,55                    | 0,017                 | 0,053                  | 0,3600                |
| 0,0400                    | 0,2167                    | 2,64                    | 0,077                 | 0,063                  | 0,3467                |

| <b>9bis. Dom gen+twd hum</b> | <b>10. Subord twd human</b> | <b>11. Subord twd dogs</b> | <b>12. Subord generic</b> | <b>12.bis Subord gen+sub vs hum</b> | <b>13. Playfulness</b> |
|------------------------------|-----------------------------|----------------------------|---------------------------|-------------------------------------|------------------------|
| 0,0850                       | 0,0918                      | 0,0850                     | 0,0167                    | 0,1051                              | 0,0306                 |
| 0,0067                       | 0,1600                      | 0,2667                     | 0,0500                    | 0,2100                              | 0,3667                 |
| 0,5300                       | 0,2800                      | 0,0667                     | 0,0071                    | 0,2871                              | 0,0000                 |
| 0,0601                       | 0,0707                      | 0,0035                     | 0,0167                    | 0,0873                              | 0,0000                 |
| 0,1867                       | 0,5333                      | 0,0100                     | 0,0033                    | 0,5367                              | 0,0067                 |
| 0,2467                       | 0,0633                      | 0,0000                     | 0,1479                    | 0,2112                              | 0,0000                 |
| 0,6109                       | 0,3385                      | 0,2140                     | 0,0070                    | 0,3455                              | 0,0156                 |
| 0,0139                       | 0,0627                      | 0,0000                     | 0,0333                    | 0,0961                              | 0,0000                 |
| 0,1667                       | 0,0967                      | 0,0200                     | 0,0000                    | 0,0967                              | 0,2033                 |
| 0,0100                       | 0,6800                      | 0,0200                     | 0,0479                    | 0,7279                              | 0,0000                 |
| 0,0171                       | 0,4795                      | 0,0856                     | 0,0067                    | 0,4827                              | 0,0274                 |
| 0,0067                       | 0,5800                      | 0,0033                     | 0,0300                    | 0,6100                              | 0,0000                 |
| 0,0600                       | 3,3033                      | 0,0100                     | 0,0200                    | 3,3233                              | 0,0000                 |
| 0,0133                       | 0,2233                      | 0,0100                     | 0,0167                    | 0,2400                              | 0,0000                 |
| 0,0933                       | 1,2100                      | 0,0167                     | 0,0000                    | 1,2100                              | 0,0067                 |
| 0,0033                       | 0,7133                      | 0,0067                     | 0,0000                    | 0,7133                              | 0,0000                 |
| 0,0700                       | 0,5100                      | 0,0000                     | 0,1267                    | 0,6367                              | 0,0000                 |
| 0,1333                       | 0,9967                      | 0,0100                     | 0,0033                    | 1,0000                              | 0,0000                 |
| 0,0500                       | 0,0100                      | 0,0100                     | 0,1200                    | 0,1300                              | 0,0000                 |
| 0,0900                       | 0,0267                      | 0,0133                     | 0,1400                    | 0,1667                              | 0,0000                 |
| 0,1467                       | 0,0300                      | 0,0267                     | 0,0467                    | 0,0767                              | 0,1267                 |
| 0,9400                       | 0,0033                      | 0,0033                     | 0,0767                    | 0,0733                              | 0,0000                 |
| 0,7700                       | 0,0100                      | 0,0100                     | 0,0433                    | 0,0533                              | 0,0000                 |
| 0,1467                       | 0,0033                      | 0,0000                     | 0,0033                    | 0,0067                              | 0,0000                 |
| 0,1767                       | 0,0000                      | 0,0000                     | 0,1567                    | 0,1567                              | 0,0000                 |
| 0,1367                       | 0,0333                      | 0,0000                     | 0,0800                    | 0,0833                              | 0,0000                 |
| 0,3767                       | 0,0067                      | 0,0200                     | 0,7500                    | 0,7567                              | 0,0000                 |
| 0,4233                       | 0,0733                      | 0,0233                     | 0,7600                    | 0,8333                              | 0,0000                 |



| <b>14. Vocal communicab</b> | <b>15. Sociabil twd human</b> | <b>16. Sociabil twd dogs</b> | <b>17. Sociabil generic</b> | <b>17.bis TOT Soc gener+soc vs um</b> | <b>18. Quiet-laziness</b> |  |
|-----------------------------|-------------------------------|------------------------------|-----------------------------|---------------------------------------|---------------------------|--|
| 0,2279                      | 0,2585                        | 0,1054                       | 0,020                       | 0,279                                 | 0,405                     |  |
| 0,1600                      | 0,0933                        | 0,1633                       | 0,000                       | 0,093                                 | 0,450                     |  |
| 0,4433                      | 0,0167                        | 0,0000                       | 0,000                       | 0,017                                 | 0,397                     |  |
| 0,0565                      | 0,0177                        | 0,0177                       | 0,004                       | 0,021                                 | 0,307                     |  |
| 0,5433                      | 0,0433                        | 0,0100                       | 0,020                       | 0,063                                 | 0,363                     |  |
| 0,6567                      | 0,0267                        | 0,0067                       | 0,017                       | 0,043                                 | 0,307                     |  |
| 0,5798                      | 0,0078                        | 0,0195                       | 0,004                       | 0,012                                 | 0,444                     |  |
| 0,0557                      | 0,0627                        | 0,0000                       | 0,000                       | 0,063                                 | 0,533                     |  |
| 0,3133                      | 0,1233                        | 0,0267                       | 0,020                       | 0,143                                 | 0,353                     |  |
| 0,9433                      | 0,7167                        | 0,0433                       | 0,100                       | 0,817                                 | 0,327                     |  |
| 0,3082                      | 0,4418                        | 0,2363                       | 0,096                       | 0,538                                 | 0,599                     |  |
| 0,1733                      | 0,1100                        | 0,0033                       | 0,000                       | 0,110                                 | 0,500                     |  |
| 0,3633                      | 0,1900                        | 0,0067                       | 0,020                       | 0,210                                 | 0,290                     |  |
| 0,1567                      | 0,0200                        | 0,0067                       | 0,003                       | 0,023                                 | 0,390                     |  |
| 0,1700                      | 0,0600                        | 0,0200                       | 0,003                       | 0,063                                 | 0,563                     |  |
| 0,0333                      | 0,0067                        | 0,0067                       | 0,017                       | 0,023                                 | 0,257                     |  |
| 0,1300                      | 0,1400                        | 0,1533                       | 0,090                       | 0,230                                 | 0,203                     |  |
| 0,1967                      | 0,0433                        | 0,0100                       | 0,073                       | 0,117                                 | 0,127                     |  |
| 0,0233                      | 0,0067                        | 0,0333                       | 0,013                       | 0,020                                 | 0,217                     |  |
| 0,0733                      | 0,1633                        | 0,0667                       | 0,277                       | 0,440                                 | 0,460                     |  |
| 0,2467                      | 0,0667                        | 0,0700                       | 0,237                       | 0,303                                 | 0,283                     |  |
| 0,5233                      | 0,0800                        | 0,0500                       | 0,177                       | 0,257                                 | 0,073                     |  |
| 0,7000                      | 0,1433                        | 0,0633                       | 0,253                       | 0,397                                 | 0,130                     |  |
| 0,0600                      | 0,0567                        | 0,0867                       | 0,143                       | 0,200                                 | 0,260                     |  |
| 0,0400                      | 0,1967                        | 0,1400                       | 0,353                       | 0,550                                 | 0,167                     |  |
| 0,4933                      | 0,0700                        | 0,0367                       | 0,163                       | 0,233                                 | 0,220                     |  |
| 0,3167                      | 0,0833                        | 0,0467                       | 0,400                       | 0,483                                 | 0,267                     |  |
| 0,1400                      | 0,0333                        | 0,0133                       | 0,057                       | 0,090                                 | 0,323                     |  |

| Latency approach killer whale (app less see) | REACTION (pos=1; neg=0) |
|----------------------------------------------|-------------------------|
| 1,34                                         | 0                       |
| 0,02                                         | 1                       |
| 0,14                                         | 1                       |
| 0,02                                         | 1                       |
| 0,09                                         | 1                       |
| 0,00                                         | 1                       |
| 0,01                                         | 1                       |
| 0,01                                         | 1                       |
| 0,05                                         | 1                       |
| 0,01                                         | 1                       |
| 18,02                                        | 0                       |
| 0,01                                         | 1                       |
| 0,01                                         | 1                       |
| 0,03                                         | 1                       |
| 28,32                                        | 0                       |
| 1,21                                         | 1                       |
| 1,16                                         | 1                       |
| 16,47                                        | 0                       |
| 0,01                                         | 1                       |
| 8,54                                         | 1                       |
| 0,57                                         | 1                       |
| 0,00                                         | 0                       |
| 0,22                                         | 0                       |
| 0,00                                         | 1                       |
| 2,30                                         | 0                       |
| 0,09                                         | 0                       |
| 0,02                                         | 1                       |
| 2,40                                         | 0                       |
