# Supplementary material for: Bold personality makes domestic dogs entering a shelter less vulnerable to diseases
Source: PubMed Central journal article supplement (PMC5875777; doi:10.1371/journal.pone.0193794), 2018-03-29
Supplement: pone.0193794.s002.pdf [file pone.0193794.s002.pdf]

S2. Table with raw data regarding latency for finding the food during the T-maze test

| Names            | Food right side        |           |                    |                    | Food left side |             |                    |             |             |                    |                    |
|------------------|------------------------|-----------|--------------------|--------------------|----------------|-------------|--------------------|-------------|-------------|--------------------|--------------------|
|                  | 1 latency finding food | Direction | 2 Direction        | 3 Direction        | 4 Direction    | 5 Direction | 6 Direction        | 7 Direction | 8 Direction | 9 Direction        | 10 Direction       |
| Pis              | 20,00                  |           | 20,00              | 20,00              | 8,46           | 0,17        | 1,02               | 0,19        | 3,55        | 0,26               | 0,50               |
| Schizzo          | 0,44                   |           | 0,08               | 0,08               | 0,06           | 0,33        | 0,50               | 0,11        | 0,43        | 0,41               | 0,37               |
| Nervo            | 4,12                   |           | 20,00              | 11,41              | 20,00          | 1,50        | 16,28              | 3,52        | 7,27        | 0,59               | 19,28              |
| Sofficino Gandhi | 5,00 L                 |           | 3,08 L             | 5,08 L             | 5,09 L         | 3,36        | 3,37 L             | 4,00 L      | 2,17 R      | 3,16               | 6,57 R             |
| Sally            | 5,30 L                 |           | 6,50 L             | 3,56 L             | 6,33 L         | 2,53 R      | 3,29 L             | 4,09 R      | 3,32 R      | 3,28 R             | 3,27 L             |
| Ululi            | 3,12 R                 |           | 4,19 R             | 10,13 R            | 5,42 R         | 2,44 R      | 5,02 L             | 2,12 R      | 3,25 R      | 5,21 L             | 3,34               |
| Chica            | 6,45 R                 |           | 4,44 R             | 6,00 R             | 7,09 R         | 2,52 R      | 3,40 R             | 5,28 L      | 3,28 R      | 3,00               | 2,55 L             |
| Bugs Bunny       | 8,32 R                 |           | 4,56 L             | 7,27 R             | 6,56 R         | 5,33 R      | 5,00 R             | 18,36 L     | 3,42 L      | 4,04 L             | 3,47 L             |
| Mary             | 5,54                   |           | 4,40               | 2,47               | 0,31           | 0,28        | 3,43 R             | 1,29 R      | 1,50 R      | 1,31 L             | 1,20 R             |
| Ab               | 20,00 L                |           | 9,38 L             | 4,41 L             | 0,41 L         | 0,08 R      | 1,30 R             | 0,20 R      | 0,28 R      | 0,19 R             | 0,19 R             |
| Frotlo           | 11,16 L                |           | 2,59 R             | 1,10 R             | 0,39 R         | 0,39 R      | 4,00 R             | 0,52 L      | 3,49 R      | 0,45 L             | 0,47 L             |
| Bistecca         | 7,48                   |           | 1,14               | 2,23 R             | 1,41 R         | 1,00 R      | 1,28 R             | 4,30 R      | 1,08 L      | 0,53 R             | 1,19 R             |
| Max              | 19,48                  |           | 0,45 L             | 1,05               | 0,28 R         | 0,36 R      | 8,45 R             | 1,50 R      | 0,34 L      | 0,34 L             | 0,30 L             |
| Ugo              | 1,48 R                 |           | 0,51 R             | 0,24 R             | 6,04 L         | 0,55 R      | 2,04 L             | 0,47 L      | 0,45 L      | 0,38 L             | 0,45 L             |
| Pedalino         | 0,16 R                 |           | 0,26 R             | 0,16 R             | 0,18 R         | 0,30 R      | 0,51 R             | 0,29 R      | 0,21 L      | 0,10 L             | 0,15 R             |
| Vecchio Rex      | 3,12 L                 |           | 4,07 L             | 20,00 L            | 17,28 R        | 2,58 L      | 3,08 L             | 1,47 R      | 0,23 L      | 0,28 L             | 0,10 L             |
| Ercole           | 20,00 L                |           | 2,51 L             | 20,00 L            | 20,00          | 20,00 R     | 5,09 L             | 2,40 R      | 3,28 R      | 3,23 L             | 2,44 L             |
| Pedro            | 19,40 R                |           | 20,00              | 6,14               | 20,00          | 4,44        | 12,10 R            | 2,49 R      | 5,37 R      | 5,00 R             | 8,27 L             |
| Benjo            | 14,35 L                |           | 5,16 R             | 17,39 R            | 0,32 R         | 0,21 R      | 3,37 R             | 1,48 R      | 2,00 R      | 2,07 L             | 0,37 L             |
| Pippo            | 20,00 L                |           | 20,00              | 1,35 R             | 2,22 R         | 12,13 R     | 2,58 L             | 1,26 L      | 0,24 L      | 0,58 L             | 1,05 L             |
| Margot           | 7,15 L                 |           | 1,04 R             | 0,36 R             | 1,36 L         | 1,12 R      | 1,00 R             | 1,35 R      | 0,49 R      | 0,47 R             | 0,11 L             |
| Rott             | 1,14 R                 |           | 20,00 Doesn't move | 20,00 Doesn't move | 20,00 R        | 5,20 R      | 20,00 Doesn't move | 20,00 R     | 20,00 R     | 20,00 Doesn't move | 20,00 Doesn't move |
| Ribes            | 0,36 R                 |           | 1,58 R             | 6,12 R             | 0,25 R         | 0,11 R      | 2,40 R             | 0,47 R      | 1,01 R      | 0,36 R             | 0,12 L             |
| Bho              | 7,58 L                 |           | 0,57 R             | 0,09 R             | 0,34 R         | 0,20 R      | 0,13 R             | 2,22 R      | 4,00 R      | 0,19 R             | 0,35 R             |
| Bravery          | 1,06 R                 |           | 18,09 L            | 0,33 R             | 0,08 R         | 0,26 L      | 20,00 R            | 19,00 R     | 0,23 R      | 0,26 R             | 1,19 R             |
| Pinza            | 6,25 L                 |           | 0,48 R             | 0,11 R             | 0,19 R         | 0,56 L      | 0,51 R             | 0,49 R      | 0,16 R      | 0,09 L             | 0,06 L             |
| Ettore           | 20,00 L                |           | 9,19 L             | 13,10 R            | 1,17 R         | 0,20 R      | 0,41 R             | 0,27 R      | 0,34 R      | 0,09 L             | 0,06 L             |
| Peggy            | 0,57 R                 |           | 1,16 L             | 1,11 R             | 0,09 R         | 0,11 R      | 0,22 R             | 0,33 R      | 0,48 R      | 1,21 R             | 0,35 R             |
